# Supplementary figures and images for: A Multidisciplinary Review of the Microbial, Functional, and Consumer Advancement of Indian Lassi
Source: Research Square preprint supplement (doi:10.21203/rs.3.rs-7781205/v1), 2025-10-17

**
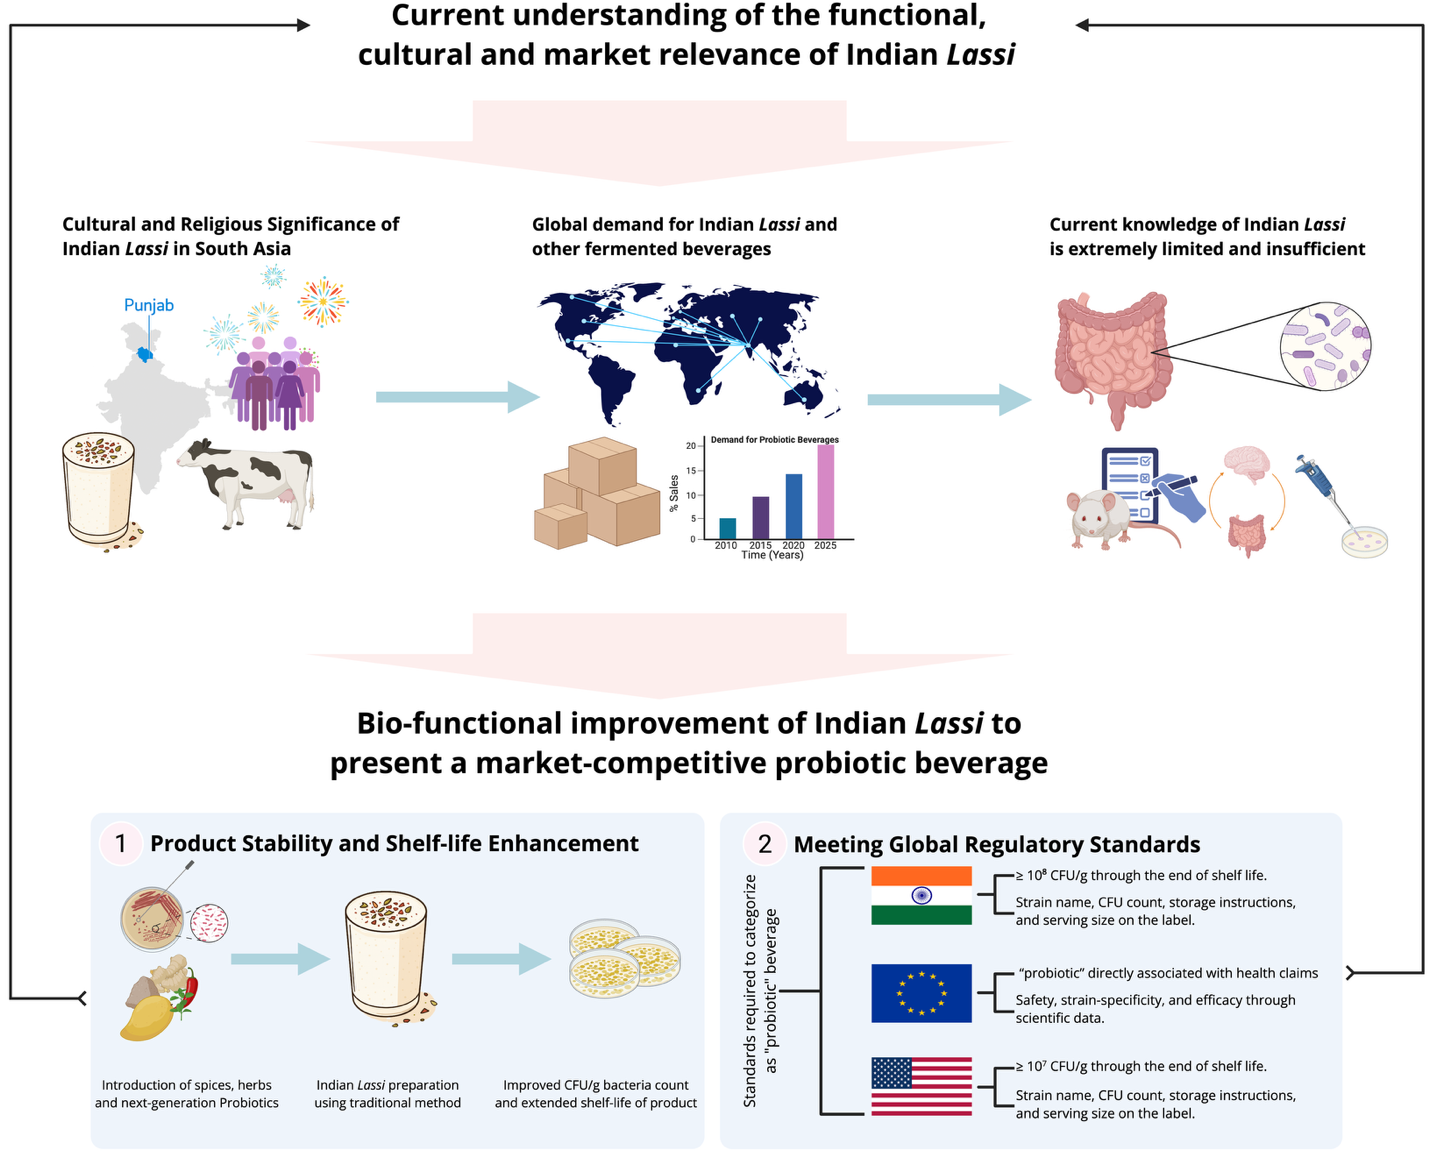
**

**Graphical Abstract**

Supplement: Supplementary file 1 [file d587fa829879c07df9d021f3.docx]
